# Supplementary material
Source: PubMed Central journal article supplement (PMC4935624)
Supplement: NIHMS777275-supplement-Supplemental_online_tables.pdf [file NIHMS777275-supplement-Supplemental_online_tables.pdf]

eTable 1. Sensitivity analyses for ISI outcome results by treatment condition

|                                                    | Insomnia Severity Index | <b>CBT-I</b> |                     | <b>MEC</b> |                   | <b>Difference</b> | p-value* |
|----------------------------------------------------|-------------------------|--------------|---------------------|------------|-------------------|-------------------|----------|
|                                                    |                         | n            | Mean (95% CI)       | n          | Mean (95% CI)     | Mean (95% CI)     |          |
| Primary analysis                                   | Baseline                | 53           | 15.6 (14.8, 16.4)   | 53         | 16.8 (15.8, 17.9) | -1.2 (-2.6, 0.1)  |          |
|                                                    | Week 8 - baseline       | 47           | -9.9 (-11.2, -8.7)  | 41         | -4.7 (-6.1, -3.3) | -5.2 (-6.1, -3.3) | <0.001   |
|                                                    | Week 24 - baseline      | 44           | -10.7 (-11.9, -9.4) | 37         | -6.7 (-8.4, -5.0) | -4.0 (-6.0, -1.9) | <0.001   |
| Excluding outcome data received > 4 weeks past due | Baseline                | 46           | 15.7 (14.8, 16.5)   | 36         | 15.8 (14.6, 17.0) | -0.1 (-1.6, 1.3)  |          |
|                                                    | Week 8 - baseline       | 43           | -10.2 (-11.5, -8.8) | 33         | -5.1 (-6.6, -3.5) | -5.1 (-7.1, -3.1) | <0.001   |
|                                                    | Week 24 - baseline      | 33           | -11.0 (-12.6, -9.4) | 25         | -7.0 (-9.4, -4.6) | -4.0 (-6.7, -1.3) | 0.002    |
| Multiple imputation based on observed MEC data     | Baseline                | 53           | 15.6 (14.8, 16.4)   | 53         | 16.8 (15.8, 17.9) | -1.2 (-2.6, 0.1)  |          |
|                                                    | Week 8 - baseline       | 53           | -9.4 (-11.1, -7.8)  | 53         | -5.7 (-8.3, -3.2) | -3.7 (-6.7, -0.7) | 0.01     |

|  |                    |    |                     |    |                    |                  |      |
|--|--------------------|----|---------------------|----|--------------------|------------------|------|
|  | Week 24 - baseline | 53 | -10.1 (-12.6, -7.5) | 53 | -6.5 (-10.1, -2.8) | -3.6 (-8.2, 0.9) | 0.02 |
|--|--------------------|----|---------------------|----|--------------------|------------------|------|

eTable2. Sensitivity analyses for PSQI outcome results by treatment condition

|                                                    | Insomnia Severity Index | CBT-I |                   | MEC |                   | Difference        | p-value* |
|----------------------------------------------------|-------------------------|-------|-------------------|-----|-------------------|-------------------|----------|
|                                                    |                         | n     | Mean (95% CI)     | n   | Mean (95% CI)     | Mean (95% CI)     |          |
| Primary analysis                                   | Baseline                | 51    | 8.9 (8.2, 9.6)    | 53  | 9.4 (8.6, 10.3)   | 0.5 (-1.6, 0.6)   |          |
|                                                    | Week 8 - baseline       | 47    | -4.0 (-5.0, -3.1) | 41  | -1.4 (-2.1, -0.7) | -2.7 (-3.9, -1.5) | <0.001   |
|                                                    | Week 24 - baseline      | 44    | -4.3 (-5.1, -3.5) | 38  | -2.7 (-3.5, -1.9) | -1.6 (-2.7, -0.5) | <0.001   |
| Excluding outcome data received > 4 weeks past due | Baseline                | 45    | 8.9 (8.2, 9.6)    | 36  | 8.8 (7.9, 9.7)    | 0.1 (-1.0, 1.2)   |          |
|                                                    | Week 8 - baseline       | 44    | -4.2 (-5.2, -3.2) | 34  | -1.5 (-2.3, -0.7) | -2.7 (-3.9, -1.4) | <0.001   |
|                                                    | Week 24 - baseline      | 33    | -4.5 (-5.4, -3.6) | 25  | -3.2 (-4.1, -2.2) | -1.3 (-2.7, 0.0)  | 0.02     |
| Multiple imputation based on observed MEC data     | Baseline                | 53    | 9.0 (8.3, 9.7)    | 53  | 9.4 (8.6, 10.3)   | -0.4 (-1.5, 0.7)  |          |
|                                                    | Week 8 - baseline       | 53    | -3.8 (-4.8, -2.7) | 53  | -1.6 (-2.8, -0.4) | -2.2 (-3.8, -0.6) | 0.003    |
|                                                    | Week 24 - baseline      | 53    | -4.2 (-5.5, -2.8) | 53  | -3.3 (-5.2, -1.5) | -0.8 (-3.2, 1.5)  | 0.27     |

CBT-I = Cognitive Behavior Therapy for Insomnia; MEC = Menopause Education Condition

\*p-values from contrasts of CBTI vs. MEC in a repeated measures linear model of outcome as a function of intervention arm, week (8, 24), and baseline outcome value.
